# Supplementary material for: Prevention of laparoscopic surgery induced hypothermia with warmed humidified insufflation: Is the experimental combination of a warming blanket synergistic?
Source: PubMed Central journal article supplement (PMC6040690; doi:10.1371/journal.pone.0199369), 2018-07-11
Supplement: pone.0199369.s001.pdf [file pone.0199369.s001.pdf]

| pig 4 control group |         |        |        | pig 1 control group |         |        |        | pig 2 control group |         |        |        | pig 3 control group |         |        |        |
|---------------------|---------|--------|--------|---------------------|---------|--------|--------|---------------------|---------|--------|--------|---------------------|---------|--------|--------|
| temps               | temper: | volume | deltaT | temps               | temper: | volume | deltaT | temps               | temper: | volume | deltaT | temps               | temper: | volume | deltaT |
| 0                   | 35.9    | 0      | 0      | 0                   | 37.1    | 0      | 0      | 0                   | 36.2    | 0      | 0      | 0                   | 36.6    | 0      | 0      |
| 15                  | 35.6    | 0      | -0.3   | 15                  | 36.9    | 0      | -0.2   | 15                  | 35.8    | 0      | -0.4   | 15                  | 36.3    | 0      | -0.3   |
| 30                  | 35.6    | 0      | -0.3   | 30                  | 36.7    | 0      | -0.4   | 30                  | 35.6    | 0      | -0.6   | 30                  | 35.9    | 0      | -0.7   |
| 45                  | 35.4    | 0      | -0.5   | 45                  | 36.5    | 0      | -0.6   | 45                  | 35.4    | 0      | -0.8   | 45                  | 35.7    | 0      | -0.9   |
| 60                  | 35.2    | 0      | -0.7   | 60                  | 36.3    | 0      | -0.8   | 60                  | 35.4    | 0      | -0.8   | 60                  | 35.5    | 0      | -1.1   |
| 75                  | 35      | 0      | -0.9   | 75                  | 36.1    | 0      | -1     | 75                  | 35.3    | 0      | -0.9   | 75                  | 35.3    | 0      | -1.3   |
| 90                  | 34.8    | 0      | -1.1   | 90                  | 36.1    | 0      | -1     | 90                  | 35.2    | 0      | -1     | 90                  | 35.3    | 0      | -1.3   |
| 105                 | 34.6    | 0      | -1.3   | 105                 | 36.1    | 0      | -1     | 105                 | 35.1    | 0      | -1.1   | 105                 | 35.1    | 0      | -1.5   |
| 120                 | 34.5    | 0      | -1.4   | 120                 | 36.1    | 0      | -1     | 120                 | 35      | 0      | -1.2   | 120                 | 35      | 0      | -1.6   |
| 135                 | 34.3    | 0      | -1.6   | 135                 | 36      | 0      | -1.1   | 135                 | 34.9    | 0      | -1.3   | 135                 | 34.9    | 0      | -1.7   |
| 150                 | 34.1    | 0      | -1.8   | 150                 | 36      | 0      | -1.1   | 150                 | 34.9    | 0      | -1.3   | 150                 | 34.7    | 0      | -1.9   |
| 165                 | 33.9    | 0      | -2     | 165                 | 36      | 0      | -1.1   | 165                 | 34.8    | 0      | -1.4   | 165                 | 34.6    | 0      | -2     |
| 180                 | 33.8    | 0      | -2.1   | 180                 | 35.8    | 0      | -1.3   | 180                 | 34.7    | 0      | -1.5   | 180                 | 34.5    | 0      | -2.1   |
| 195                 | 33.6    | 0      | -2.3   | 195                 | 35.8    | 0      | -1.3   | 195                 | 34.7    | 0      | -1.5   | 195                 | 34.3    | 0      | -2.3   |
| 210                 | 33.4    | 0      | -2.5   | 210                 | 35.8    | 0      | -1.3   | 210                 | 34.6    | 0      | -1.6   | 210                 | 34.2    | 0      | -2.4   |
| 225                 | 33.2    | 0      | -2.7   | 225                 | 35.9    | 0      | -1.2   | 225                 | 34.6    | 0      | -1.6   | 225                 | 34.1    | 0      | -2.5   |
| 240                 | 33      | 0      | -2.9   | 240                 | 35.9    | 0      | -1.2   | 240                 | 34.6    | 0      | -1.6   | 240                 | 33.9    | 0      | -2.7   |

| pig 2 warmed insufflation group |         |        |        | pig 3 warmed insufflation group |         |        |        | pig 4 warmed insufflation group |         |        |        | pig 1 warmed insufflation group |         |        |        |
|---------------------------------|---------|--------|--------|---------------------------------|---------|--------|--------|---------------------------------|---------|--------|--------|---------------------------------|---------|--------|--------|
| temps                           | temper: | volume | deltaT | temps                           | temper: | volume | deltaT | temps                           | temper: | volume | deltaT | temps                           | temper: | volume | deltaT |
| 0                               | 35.8    | 0      | 0      | 0                               | 39.4    | 0      | 0      | 0                               | 37      | 0      | 0      | 0                               | 36      | 0      | 0      |
| 15                              | 35.6    | 30.6   | -0.2   | 15                              | 39      | 30     | -0.4   | 15                              | 36.8    | 68.7   | -0.2   | 15                              | 35.9    | 30     | -0.1   |
| 30                              | 35.4    | 60.2   | -0.4   | 30                              | 38.8    | 360    | -0.6   | 30                              | 36.5    | 93.5   | -0.5   | 30                              | 35.9    | 60     | -0.1   |
| 45                              | 35.3    | 91.1   | -0.5   | 45                              | 38.7    | 90     | -0.7   | 45                              | 36.4    | 101    | -0.6   | 45                              | 35.8    | 90     | -0.2   |
| 60                              | 35.1    | 120    | -0.7   | 60                              | 38.6    | 120    | -0.8   | 60                              | 36.2    | 119    | -0.8   | 60                              | 35.8    | 120    | -0.2   |
| 75                              | 35      | 150    | -0.8   | 75                              | 38.5    | 1250   | -0.9   | 75                              | 36.1    | 153    | -0.9   | 75                              | 35.7    | 150    | -0.3   |
| 90                              | 34.7    | 180    | -1.1   | 90                              | 38.4    | 180    | -1     | 90                              | 36      | 180    | -1     | 90                              | 35.6    | 180    | -0.4   |

|     |      |     |      |     |      |     |      |     |      |     |      |     |      |     |      |
|-----|------|-----|------|-----|------|-----|------|-----|------|-----|------|-----|------|-----|------|
| 105 | 34.5 | 210 | -1.3 | 105 | 38.4 | 210 | -1   | 105 | 35.9 | 210 | -1.1 | 105 | 35.5 | 210 | -0.5 |
| 120 | 34.2 | 240 | -1.6 | 120 | 38.4 | 240 | -1   | 120 | 35.8 | 240 | -1.2 | 120 | 35.5 | 240 | -0.5 |
| 135 | 34   | 270 | -1.8 | 135 | 38.3 | 270 | -1.1 | 135 | 35.7 | 270 | -1.3 | 135 | 35.4 | 270 | -0.6 |
| 150 | 33.8 | 300 | -2   | 150 | 38.3 | 300 | -1.1 | 150 | 35.6 | 300 | -1.4 | 150 | 35.2 | 300 | -0.8 |
| 165 | 33.7 | 330 | -2.1 | 165 | 38.2 | 330 | -1.2 | 165 | 35.5 | 330 | -1.5 | 165 | 35.2 | 330 | -0.8 |
| 180 | 33.5 | 360 | -2.3 | 180 | 38.2 | 360 | -1.2 | 180 | 35.5 | 360 | -1.5 | 180 | 35.1 | 360 | -0.9 |
| 195 | 33.3 | 390 | -2.5 | 195 | 38.2 | 390 | -1.2 | 195 | 35.4 | 390 | -1.6 | 195 | 35   | 390 | -1   |
| 210 | 33.2 | 420 | -2.6 | 210 | 38.2 | 420 | -1.2 | 210 | 35.3 | 420 | -1.7 | 210 | 35   | 420 | -1   |
| 225 | 33   | 450 | -2.8 | 225 | 38.2 | 450 | -1.2 | 225 | 35.3 | 450 | -1.7 | 225 | 34.9 | 450 | -1.1 |
| 240 | 32.8 | 480 | -3   | 240 | 38.3 | 480 | -1.1 | 240 | 35.2 | 480 | -1.8 | 240 | 34.8 | 480 | -1.2 |

| pig 1 forced air group |         |        |        | pig 2 forced air group |         |        |        | pig 3 forced air group |         |        |        | pig 4 forced air group |         |        |        |
|------------------------|---------|--------|--------|------------------------|---------|--------|--------|------------------------|---------|--------|--------|------------------------|---------|--------|--------|
| temps                  | temper: | volume | deltaT | temps                  | temper: | volume | deltaT | temps                  | temper: | volume | deltaT | temps                  | temper: | volume | deltaT |
| 0                      | 36.8    | 0      | 0      | 0                      | 37.9    | 0      | 0      | 0                      | 37      | 0      | 0      | 0                      | 35.9    | 0      | 0      |
| 15                     | 36.7    | 30     | -0.1   | 15                     | 37.9    | 30     | 0      | 15                     | 36.7    | -0.3   | 15     | 35.5                   | 30      | -0.4   |        |
| 30                     | 36.4    | 60.1   | -0.4   | 30                     | 37.9    | 60.1   | 0      | 30                     | 36.5    | -0.5   | 30     | 35.4                   | 60      | -0.5   |        |
| 45                     | 36.2    | 90.2   | -0.6   | 45                     | 37.9    | 90.1   | 0      | 45                     | 36.5    | -0.5   | 45     | 35.2                   | 90      | -0.7   |        |
| 60                     | 36      | 120    | -0.8   | 60                     | 37.8    | 120    | -0.1   | 60                     | 36.6    | -0.4   | 60     | 35.1                   | 120     | -0.8   |        |
| 75                     | 35.8    | 150    | -1     | 75                     | 37.8    | 150    | -0.1   | 75                     | 36.7    | -0.3   | 75     | 34.9                   | 150     | -1     |        |
| 90                     | 35.6    | 181    | -1.2   | 90                     | 37.9    | 180    | 0      | 90                     | 36.7    | -0.3   | 90     | 34.8                   | 180     | -1.1   |        |
| 105                    | 35.5    | 210    | -1.3   | 105                    | 37.9    | 210    | 0      | 105                    | 36.7    | -0.3   | 105    | 34.7                   | 210     | -1.2   |        |
| 120                    | 35.4    | 241    | -1.4   | 120                    | 37.9    | 240    | 0      | 120                    | 36.7    | -0.3   | 120    | 34.4                   | 240     | -1.5   |        |
| 135                    | 35.3    | 270    | -1.5   | 135                    | 38      | 270    | 0.1    | 135                    | 36.8    | -0.2   | 135    | 34.4                   | 270     | -1.5   |        |
| 150                    | 35.1    | 3300   | -1.7   | 150                    | 38      | 300    | 0.1    | 150                    | 36.8    | -0.2   | 150    | 34.2                   | 300     | -1.7   |        |
| 165                    | 34.8    | 330    | -2     | 165                    | 38.1    | 330    | 0.2    | 165                    | 36.8    | -0.2   | 165    | 34.1                   | 330     | -1.8   |        |
| 180                    | 34.6    | 360    | -2.2   | 180                    | 38.2    | 360    | 0.3    | 180                    | 36.8    | -0.2   | 180    | 33.9                   | 360     | -2     |        |
| 195                    | 34.4    | 390    | -2.4   | 195                    | 38.2    | 390    | 0.3    | 195                    | 36.9    | -0.1   | 195    | 33.8                   | 390     | -2.1   |        |
| 210                    | 34.2    | 420    | -2.6   | 210                    | 38.3    | 421    | 0.4    | 210                    | 36.9    | -0.1   | 210    | 33.6                   | 420     | -2.3   |        |
| 225                    | 34      | 450    | -2.8   | 225                    | 38.3    | 450    | 0.4    | 225                    | 36.9    | -0.1   | 225    | 33.5                   | 450     | -2.4   |        |
| 240                    | 33.5    | 480    | -3.3   | 240                    | 38.4    | 480    | 0.5    | 240                    | 37      | 0      | 240    | 33.4                   | 480     | -2.5   |        |

| pig 3             |         |        |        | pig 4             |         |        |        | pig 1             |         |        |        | pig 2             |         |        |        |
|-------------------|---------|--------|--------|-------------------|---------|--------|--------|-------------------|---------|--------|--------|-------------------|---------|--------|--------|
| combination group |         |        |        | combination group |         |        |        | combination group |         |        |        | combination group |         |        |        |
| temps             | temper: | volume | deltaT | temps             | temper: | volume | deltaT | temps             | temper: | volume | deltaT | temps             | temper: | volume | deltaT |
| 0                 | 37      | 0      | 0      | 0                 | 38.4    | 0      | 0      | 0                 | 37.9    | 0      | 0      | 0                 | 36.1    | 0      | 0      |
| 15                | 37.1    | 30     | 0.1    | 15                | 38.5    | 30     | 0.1    | 15                | 37.3    | 15     | -0.6   | 15                | 36.1    | 30     | 0      |
| 30                | 37.1    | 60     | 0.1    | 30                | 38.5    | 60     | 0.1    | 30                | 37.4    | 60.2   | -0.5   | 30                | 36.1    | 60.1   | 0      |
| 45                | 37.1    | 90     | 0.1    | 45                | 38.5    | 90     | 0.1    | 45                | 37.4    | 90.2   | -0.5   | 45                | 36.1    | 90.2   | 0      |
| 60                | 37.1    | 120    | 0.1    | 60                | 38.5    | 120    | 0.1    | 60                | 37.2    | 120    | -0.7   | 60                | 36.2    | 120    | 0.1    |
| 75                | 37      | 150    | 0      | 75                | 38.5    | 150    | 0.1    | 75                | 37.2    | 150    | -0.7   | 75                | 36.2    | 150    | 0.1    |
| 90                | 37      | 180    | 0      | 90                | 38.6    | 180    | 0.2    | 90                | 37.1    | 180    | -0.8   | 90                | 36.3    | 180    | 0.2    |
| 105               | 37      | 210    | 0      | 105               | 38.6    | 210    | 0.2    | 105               | 37.1    | 210    | -0.8   | 105               | 36.3    | 210    | 0.2    |
| 120               | 37      | 240    | 0      | 120               | 38.7    | 240    | 0.3    | 120               | 37.1    | 240    | -0.8   | 120               | 36.4    | 242    | 0.3    |
| 135               | 37      | 270    | 0      | 135               | 38.7    | 270    | 0.3    | 135               | 37.2    | 270    | -0.7   | 135               | 36.4    | 271    | 0.3    |
| 150               | 36.9    | 300    | -0.1   | 150               | 38.8    | 300    | 0.4    | 150               | 37.4    | 300    | -0.5   | 150               | 36.5    | 301    | 0.4    |
| 165               | 36.8    | 330    | -0.2   | 165               | 38.8    | 330    | 0.4    | 165               | 37.5    | 330    | -0.4   | 165               | 36.5    | 331    | 0.4    |
| 180               | 36.8    | 360    | -0.2   | 180               | 38.9    | 360    | 0.5    | 180               | 37.6    | 36     | -0.3   | 180               | 36.6    | 360    | 0.5    |
| 195               | 36.8    | 390    | -0.2   | 195               | 39      | 390    | 0.6    | 195               | 37.7    | 390    | -0.2   | 195               | 36.6    | 390    | 0.5    |
| 210               | 36.8    | 420    | -0.2   | 210               | 39.1    | 420    | 0.7    | 210               | 37.9    | 420    | 0      | 210               | 36.6    | 420    | 0.5    |
| 225               | 36.7    | 450    | -0.3   | 225               | 39.2    | 450    | 0.8    | 225               | 38      | 450    | 0.1    | 225               | 36.7    | 449    | 0.6    |
| 240               | 36.7    | 480    | -0.3   | 240               | 39.2    | 480    | 0.8    | 240               | 38.1    | 480    | 0.2    | 240               | 36.7    | 480    | 0.6    |
